# Supplementary material for: Probing the electrochemical behavior of {111} and {110} faceted hollow Cu2O microspheres for lithium storage
Source: Royal Society of Chemistry journal article supplement (doi:10.1039/c6ra21026k), 2016-01-01
Supplement: c6ra21026k1.pdf [file c6ra21026k1.pdf]

## Supporting Information

### Probing Electrochemical Behaviors of {111} and {110} Faceted Hollow Cu<sub>2</sub>O Microspheres for Lithium Storage

Wen-Bei Yu,<sup>a,\*\*</sup> Zhi-Yi Hu,<sup>b,\*\*</sup> Ming Yi,<sup>a,\*\*</sup> Dai-Song Chen,<sup>a</sup> Shao-Zhuan Huang,<sup>a</sup> Jun  
Jin,<sup>a</sup> Yu Li,<sup>\*,a</sup> G. Van Tendeloo<sup>a,b</sup> and Bao-Lian Su<sup>\*,a,c,d</sup>

<sup>a</sup> State Key Laboratory of Advanced Technology for Materials Synthesis and Processing, Wuhan University of Technology, 122 Luoshi Road, 430070 Wuhan, Hubei, China; Email: [yu.li@whut.edu.cn](mailto:yu.li@whut.edu.cn) and [baoliansu@whut.edu.cn](mailto:baoliansu@whut.edu.cn)

<sup>b</sup> EMAT (Electron Microscopy for Materials Science), University of Antwerp, 171 Groenenborgerlaan, B-2020 Antwerp, Belgium

<sup>c</sup> Laboratory of Inorganic Materials Chemistry (CMI), University of Namur, 61 rue de Bruxelles, 5000 Namur, Belgium; E-mail: [bao-lian.su@unamur.be](mailto:bao-lian.su@unamur.be)

<sup>d</sup> Department of Chemistry and Clare Hall, University of Cambridge, Cambridge CB2 1EW, United Kingdom; E-mail: [bls26@cam.ac.uk](mailto:bls26@cam.ac.uk)

\* To whom correspondence should be addressed.

\*\* The authors contribute equally to this work.

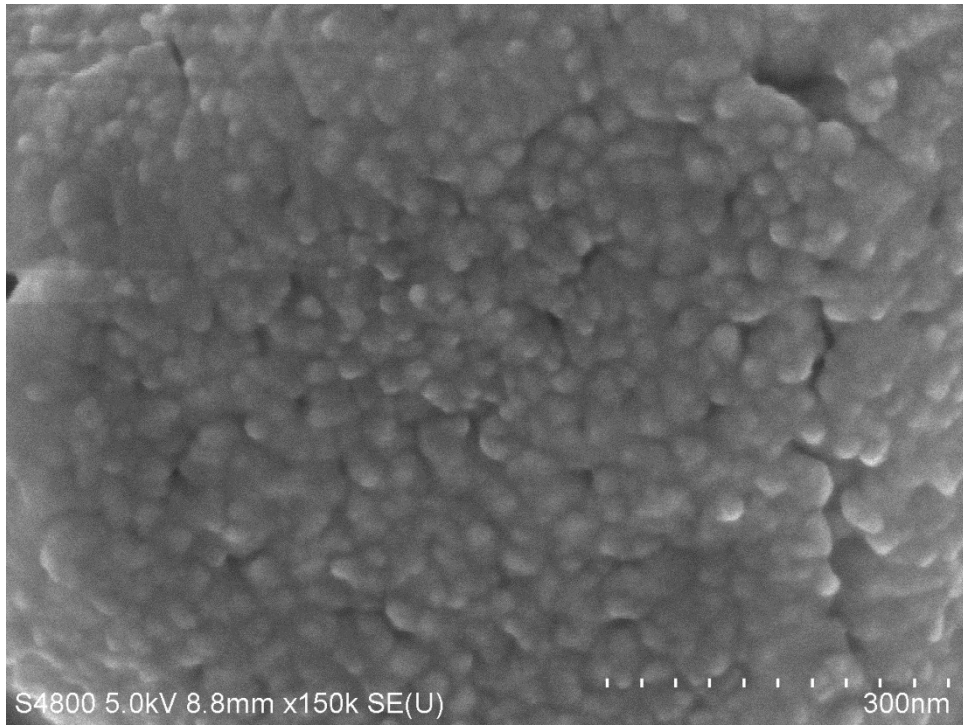

**Fig. S1.** SEM image of the commercial Cu<sub>2</sub>O-NPs.

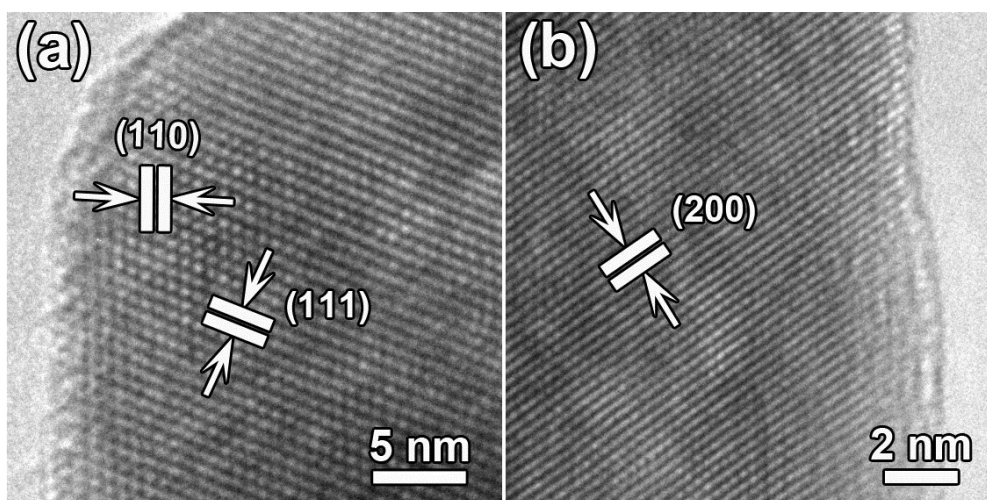

**Fig. S2.** HRTEM images of the commercial  $\text{Cu}_2\text{O}$ -NPs.

**Table S1.** BET surface areas of HMs- $\text{Cu}_2\text{O}$  and commercial  $\text{Cu}_2\text{O}$ -NPs.

| Sample                                | BET surface Area ( $\text{cm}^3/\text{g}$ ) |
|---------------------------------------|---------------------------------------------|
| HMs- $\text{Cu}_2\text{O}$            | 7.05                                        |
| commercial $\text{Cu}_2\text{O}$ -NPs | 6.95                                        |
